# Supplementary material for: Alcohol consumption promotes colorectal carcinoma metastasis via a CCL5-induced and AMPK-pathway-mediated activation of autophagy
Source: PubMed Central journal article supplement (PMC5988731; doi:10.1038/s41598-018-26856-w), 2018-06-05
Supplement: 41598_2018_26856_MOESM1_ESM.pdf [file 41598_2018_26856_MOESM1_ESM.pdf]

**Alcohol consumption promotes colorectal carcinoma metastasis via a CCL5-induced and AMPK-pathway-mediated activation of autophagy**

Haodong Zhao<sup>1</sup>, Danlei Chen<sup>1</sup>, Rui Cao<sup>1</sup>, Shiqing Wang<sup>1</sup>, Dandan Yu<sup>1</sup>, Yakun Liu<sup>1</sup>, Yu Jiang<sup>1</sup>, Mei Xu<sup>2</sup>, Jia Luo<sup>2\*</sup> and Siying Wang<sup>1\*</sup>

Supplement 1 Major clinical characteristics of 102 CRC patients

| Covariates          |                   | All case (n=102) |
|---------------------|-------------------|------------------|
| Sex                 | Male              | 68(66.7)         |
|                     | Female            | 34(33.3)         |
| Age(yr)             | Mean±SD           | 57.44±12.848     |
| TNM stage           | I                 | 7(6.9)           |
|                     | II                | 55(53.9)         |
|                     | III               | 30(29.4)         |
|                     | IV                | 10(9.8)          |
| Metastasis          | Negative          | 63(53.9)         |
|                     | Positive          | 39(38.2)         |
| Grade               | High & Moderately | 75(73.5)         |
|                     | Poorly            | 27(26.5)         |
| IBD                 | Negative          | 70(68.6)         |
|                     | Positive          | 32(31.4)         |
| Location            | Colon             | 50(49.0)         |
|                     | Rectum            | 52(51.0)         |
| Alcohol consumption | Never             | 43(42.2)         |
|                     | Ever              | 59(57.8)         |

Supplement 2 Univariate analysis of tumor characteristics and alcohol consumption in the 102  
CRC patients

| Variables    |                     | Alcohol Consumption n (%) |          | X <sup>2</sup> | P value |
|--------------|---------------------|---------------------------|----------|----------------|---------|
|              |                     | Never                     | Ever     |                |         |
| Gender       | Male                | 17(25)                    | 51(75)   | 24.62          | 0.000** |
|              | Female              | 26(76.5)                  | 8(23.5)  |                |         |
| Age          | ≤60                 | 30(54.5)                  | 25(45.5) | 7.513          | 0.060   |
|              | >60                 | 13(27.2)                  | 34(72.3) |                |         |
| IBD          | Negative            | 34(40.0)                  | 51(60.0) | 0.973          | 0.324   |
|              | Positive            | 9(52.9)                   | 8(47.1)  |                |         |
| TNM<br>Stage | I                   | 6(85.7)                   | 1(14.3)  | 10.04          | 0.018*  |
|              | II                  | 26(47.3)                  | 29(52.7) |                |         |
|              | III                 | 8(26.7)                   | 22(73.3) |                |         |
|              | IV                  | 3(30.0)                   | 7(70.0)  |                |         |
| Location     | Colon               | 21(42.0)                  | 29(58.0) | 0.001          | 0.975   |
|              | Rectum              | 22(42.3)                  | 30(57.7) |                |         |
| Grade        | High&<br>Moderately | 37(49.3)                  | 38(50.7) | 5.984          | 0.014*  |
|              | Poorly              | 6(22.2)                   | 21(77.8) |                |         |
| Metastasis   | Negative            | 32(50.8)                  | 31(49.2) | 5.040          | 0.025*  |
|              | Positive            | 11(28.2)                  | 28(71.8) |                |         |

\*P<0.05

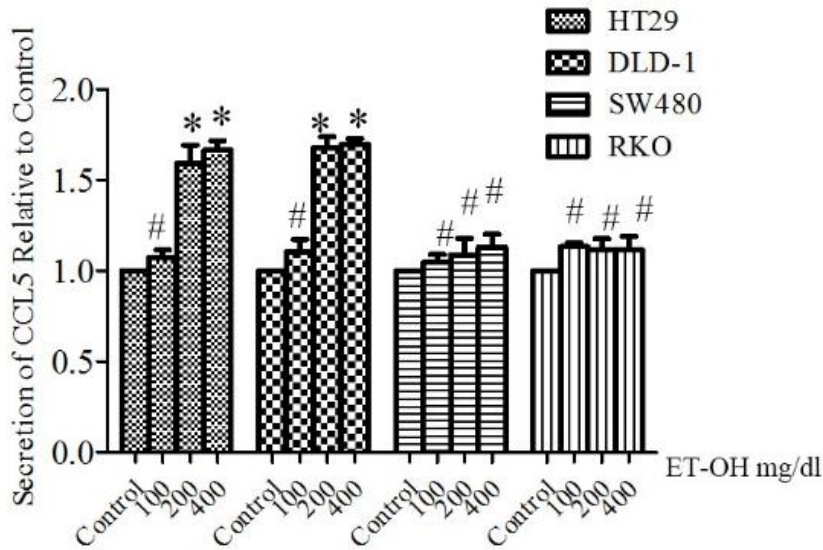

Supplement 3 Colorectal cancer cells were exposed to alcohol with different concentration for 14 days and conditioned medium were collected and assayed for secreted CCL5 by ELISA. Each data point was the mean  $\pm$  SEM of three independent experiments and presented relative to the control.

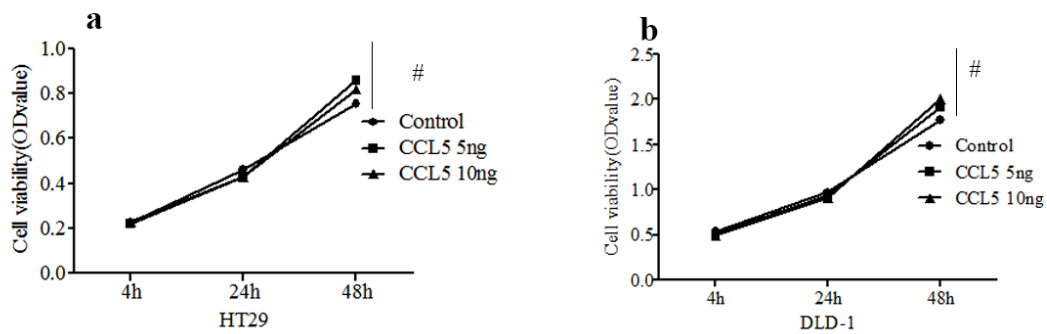

Supplement 4 CCL5 has no effect on CRC cells proliferation ( $\#P > 0.05$ ). Each data point was the mean  $\pm$  SEM of three independent experiments and presented relative to the control value. ( $\#P > 0.05$  n=3).

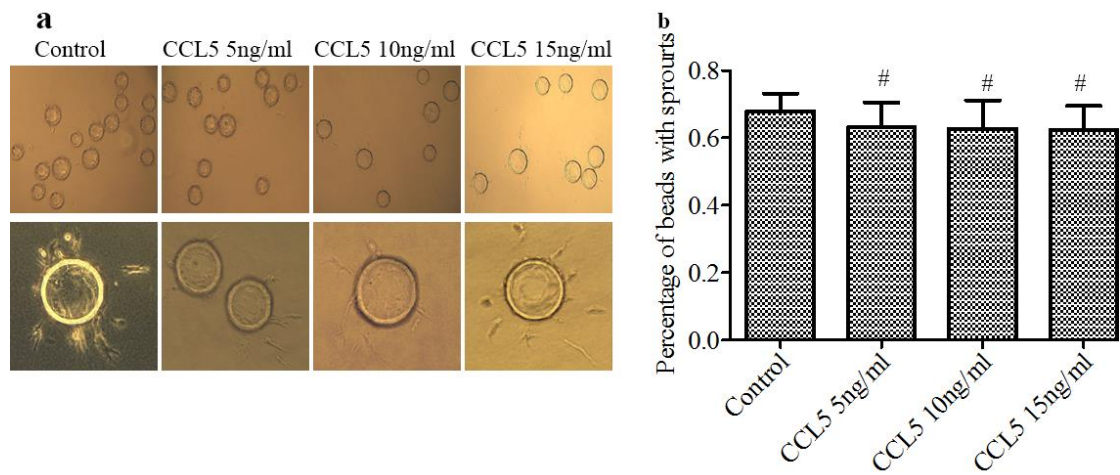

Supplement 5 CCL5 has no effect on angiogenesis (# $P > 0.05$ ). Each data point was the mean  $\pm$  SEM of three independent experiments and presented relative to the control values. (# $P > 0.05$  n=3)

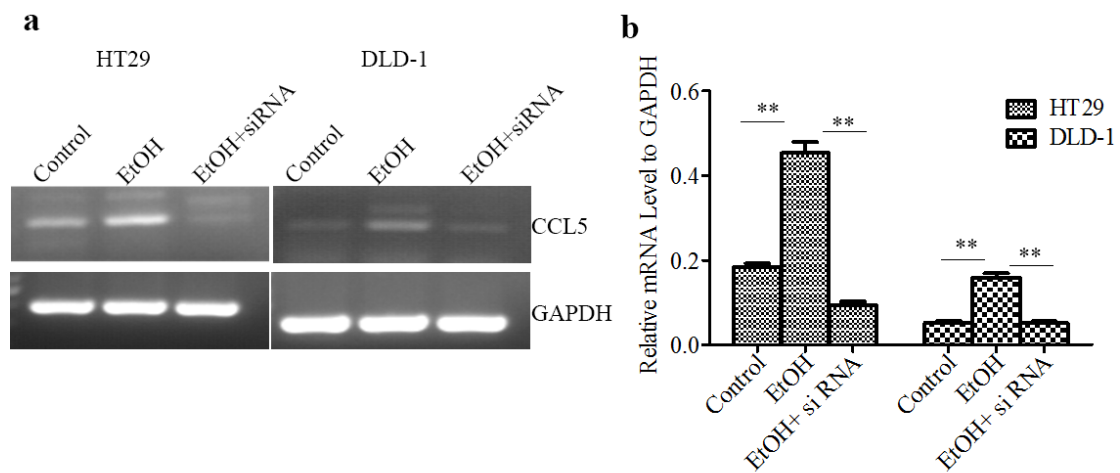

Supplement 6 EtOH stimulated HT29 and DLD-1 cells for two weeks and then transfected with si-CCL5. CCL5 expression was analyzed by RT-PCR. Each data point was the mean  $\pm$  SEM of three independent experiments and presented relative to the control values (\*\* $P < 0.01$  n=3).

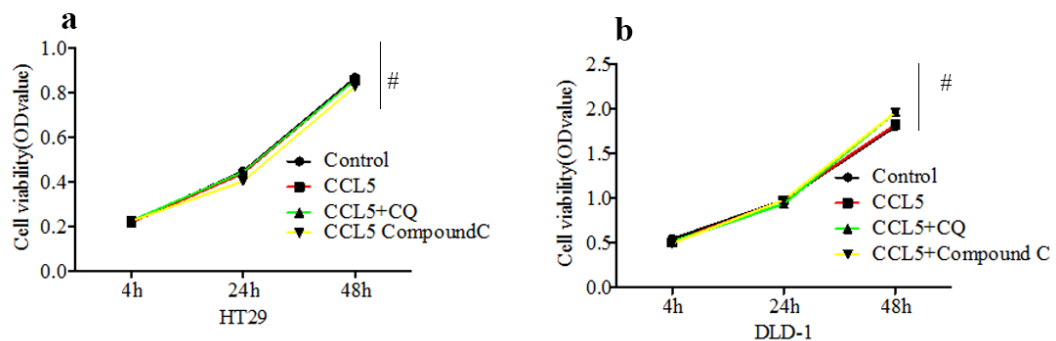

Supplement 7 Blocked autophagy has no effect on HT29 and DLD-1 cells proliferation.. Each data point was the mean  $\pm$  SEM of three independent experiments and presented relative to the control values. (# $P > 0.05$ )

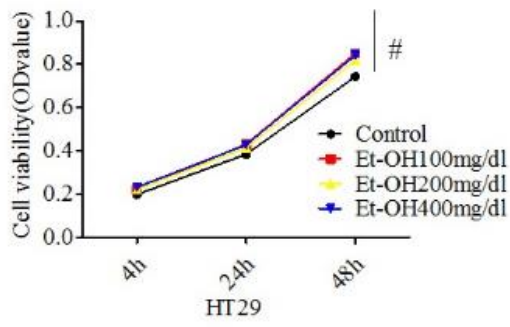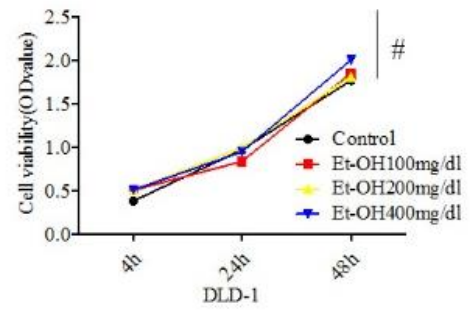

Supplement 8 Et-OH has no effect on CRC cells proliferation (#P>0.05. Each data point was the mean±SEM of three independent experiments and presented relative to the control value. (#P>0.05 n=3)
